# Supplementary material
Source: publisher figshare collection journal article supplement (https://gsapubs.figshare.com/articles/dataset/_/12535292)
Supplement: Supplementary file 1 [file 1]

## ID48 Garnet Compositional Isopleths

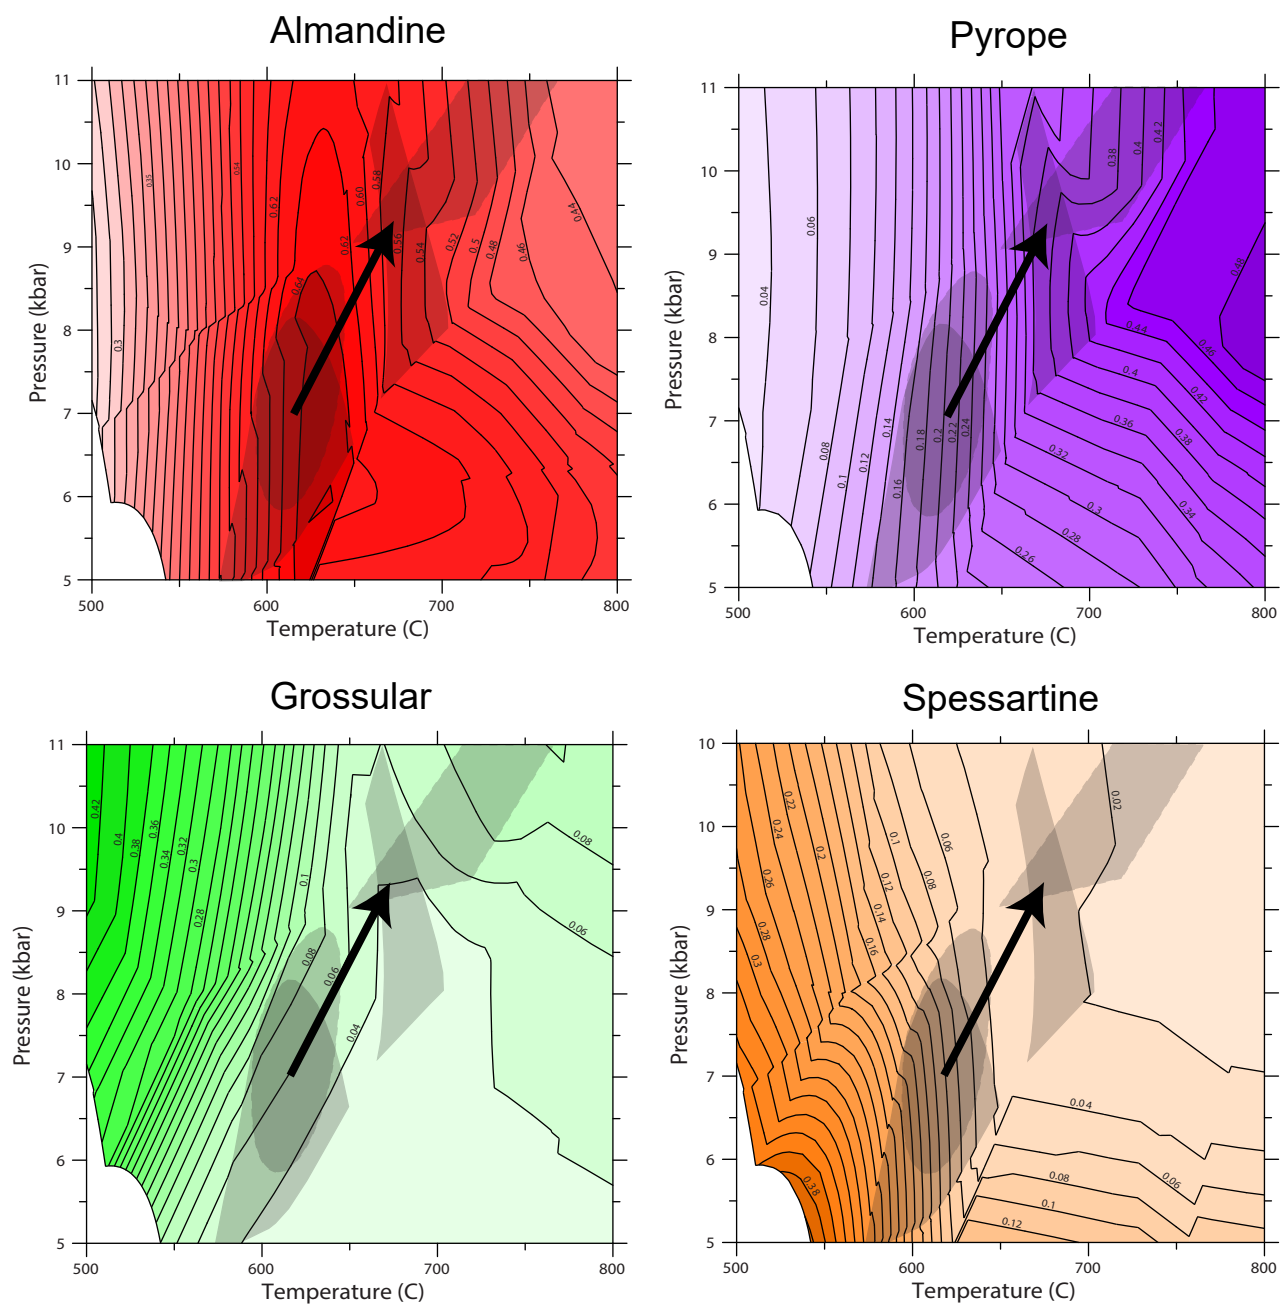

Garnet compositional isopleths for ID48 (almandine, pyrope, grossular, and spessartine). Shaded regions are assemblage fields, isopleth intersections, and thermobarometry P-T conditions. Arrow shows the path along which garnet grew (see text for discussion). Isopleths reflect the observed zoning profile for garnet in this sample (see line scan).

Figure DR1.

## ID48 Garnet Fractionation (80%) P-T Model

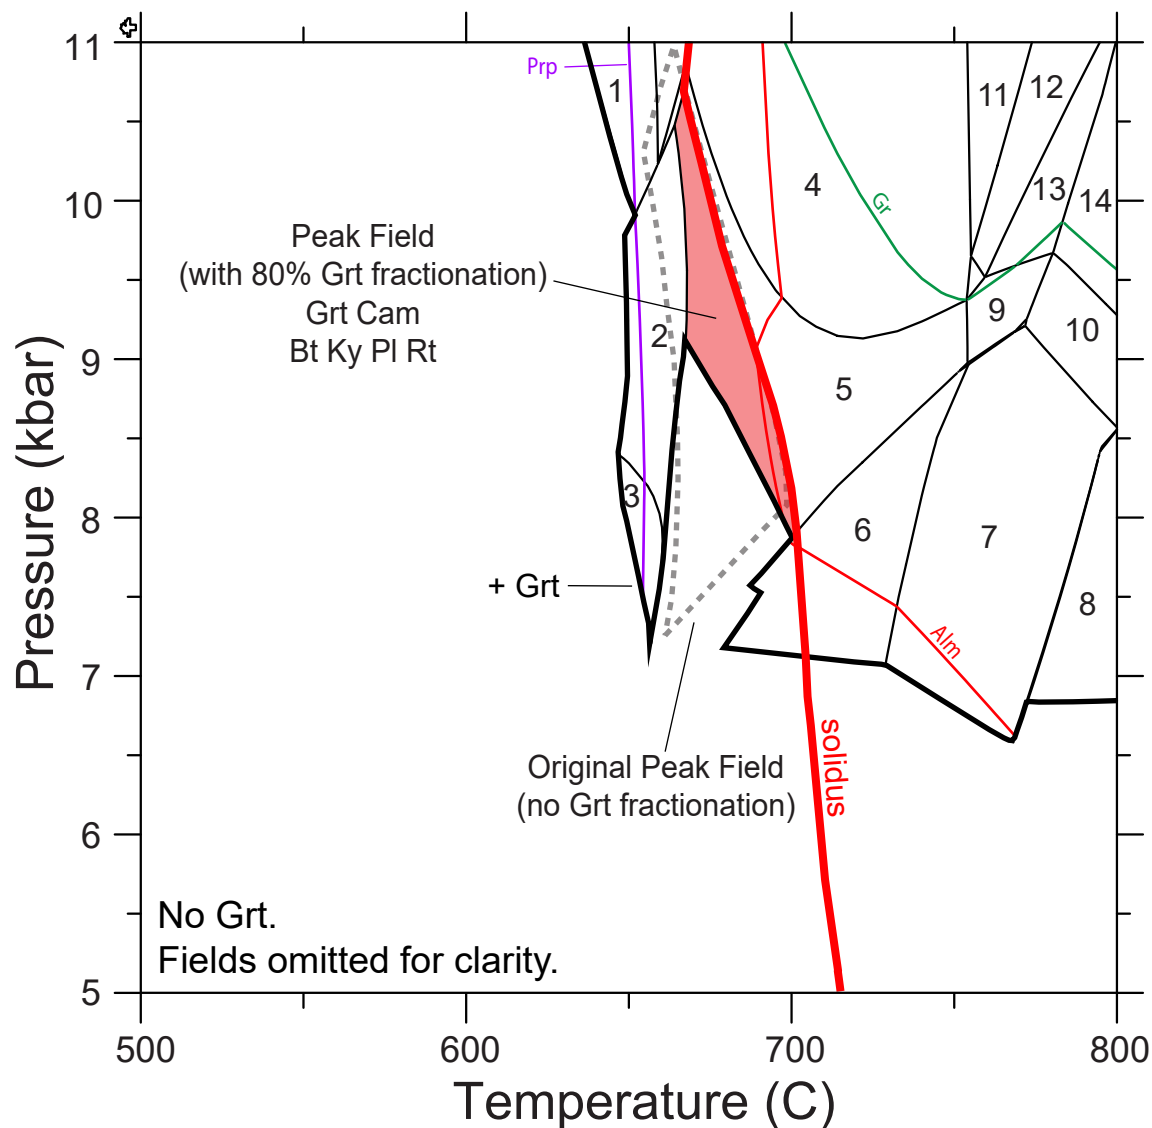

- |                                               |                                  |
|-----------------------------------------------|----------------------------------|
| 1. Grt Ky Cam Bt Chl Wm Rt Qtz                | 8. Grt Crd Cam Opx Bt Rt Pl Melt |
| 2. Grt Ky Cam Bt Chl Rt Pl Qtz                | 9. Grt Ky Cam Bt Rt Pl Melt      |
| 3. Grt Ky Bt Chl Rt Pl Qtz                    | 10. Grt Cam Bt Rt Pl Melt        |
| 4. Grt Ky Cam Bt Rt Qtz Melt H <sub>2</sub> O | 11. Grt Ky Cam Bt Rt Qtz Melt    |
| 5. Grt Ky Cam Bt Rt Pl Qtz Melt               | 12. Grt Ky Cam Bt Rt Melt        |
| 6. Grt Crd Cam Bt Rt Pl Qtz Melt              | 13. Grt Ky Cam Bt Rt Pl Melt     |
| 7. Grt Crd Cam Bt Rt Pl Melt                  | 14. Grt Cam Bt Rt Pl Melt        |

### Garnet Rim Composition

Alm 0.57      Gr 0.07  
Prp 0.31      Sps 0.05

Figure DR2.
